# Supplementary material
Source: PubMed Central journal article supplement (PMC4559682)
Supplement: SD3.pdf [file SD3.pdf]

SUPPLEMENTAL TABLE 1  
Primers used to sequence the genome of Entebbe bat virus

| Primer | 5' to 3' sequence     | Primer     | 5' to 3' sequence     |
|--------|-----------------------|------------|-----------------------|
| 15F    | TAATCGCTTGGCGTTAGTCC  | 5979F      | CCAGACCGACACACTGACAC  |
| 859R   | CCCATCTTTCCACTTTTCC   | 6819R      | ATCTCTGCATTCTGCGTCT   |
| 767F   | CAAGCCACATAACGGAAGGT  | 6610F      | TCCCAGAAG CTATGCTCACC |
| 1418R  | TCAGAGGTGTGCAGTTGGAG  | 6976R      | TCTGCTTGTGACCGAAGATG  |
| 1154F  | GGAAGGTGTGCTACGATGCT  | 6726F      | GATGGGGATGTTTCAGTCGT  |
| 1751R  | TCACAGCTCCTTCCTGATCC  | 7567R      | AGAAGCCCAGCCACACCTAC  |
| 1399F  | CTCCAAC TGCACACCTCTGA | 7420F      | TCTCACTCGCCAATGTGTTC  |
| 2192R  | CTTTCAATGCCCTCATGT    | 8257R      | ACGAGTCCACCACCAAAAAC  |
| 1908F  | CGGACACCAAACAGTGCTAA  | 7979F      | GAGGACAACCTATGGCTGGA  |
| 2650R  | TTCCACATTCGATGCTCAAG  | 8796R      | CCAGTTGCTGGAAGATCCAC  |
| 2491F  | GGTGATGCGTGTCATCTTC   | 8678F      | CACACCTTTGGACAGCAGA   |
| 3299R  | TTGGTCCCTGGACAGACTTC  | 9523R      | TCCTCTGACTCAGCCATCCT  |
| 3142F  | GGACAAGCACAGTTCAAGA   | 9327F      | ATCCTCGCTGAAGCAGTCAT  |
| 3973R  | AGCCAGTAATCCGAGCATTG  | 10125R     | TCTCCTGCATGTGAGGATTG  |
| 3839F  | TCCATATCCCAAGTGGTGCT  | 9882F      | TGGATGGTAAGGGAAACTGG  |
| 4675R  | CCCTTCTGGTTTATGGCGTA  | 10500R     | GGTCTTTTCCAGGTGTCAA   |
| 4415F  | GGACCTCTGAACGCTTGGAC  | RACE514R   | TCCAGGGTTCCACTAAACA   |
| 4867R  | GAGTTTCCAGTTGCCACCAT  | RACE388R   | ATTGGCGATGTTCTCACTC   |
| 4580F  | CAGCAACATCATGTGGGAAT  | RACE10328F | TACGCGGACTACATGCAAAC  |
| 5406R  | CTGGTTCAAGCAACCGATTT  | -          | -                     |
| 5285F  | TGAAGCACTCAAGGACATGC  | -          | -                     |
| 6091R  | CCAGGGATTCCATGTTGTC   | -          | -                     |
